# Supplementary material for: Paternal Poly (ADP-ribose) Metabolism Modulates Retention of Inheritable Sperm Histones and Early Embryonic Gene Expression
Source: PubMed Central journal article supplement (PMC4014456; doi:10.1371/journal.pgen.1004317), 2014-05-08
Supplement: pgen.1004317.s006.pdf [file pgen.1004317.s006.pdf]

A

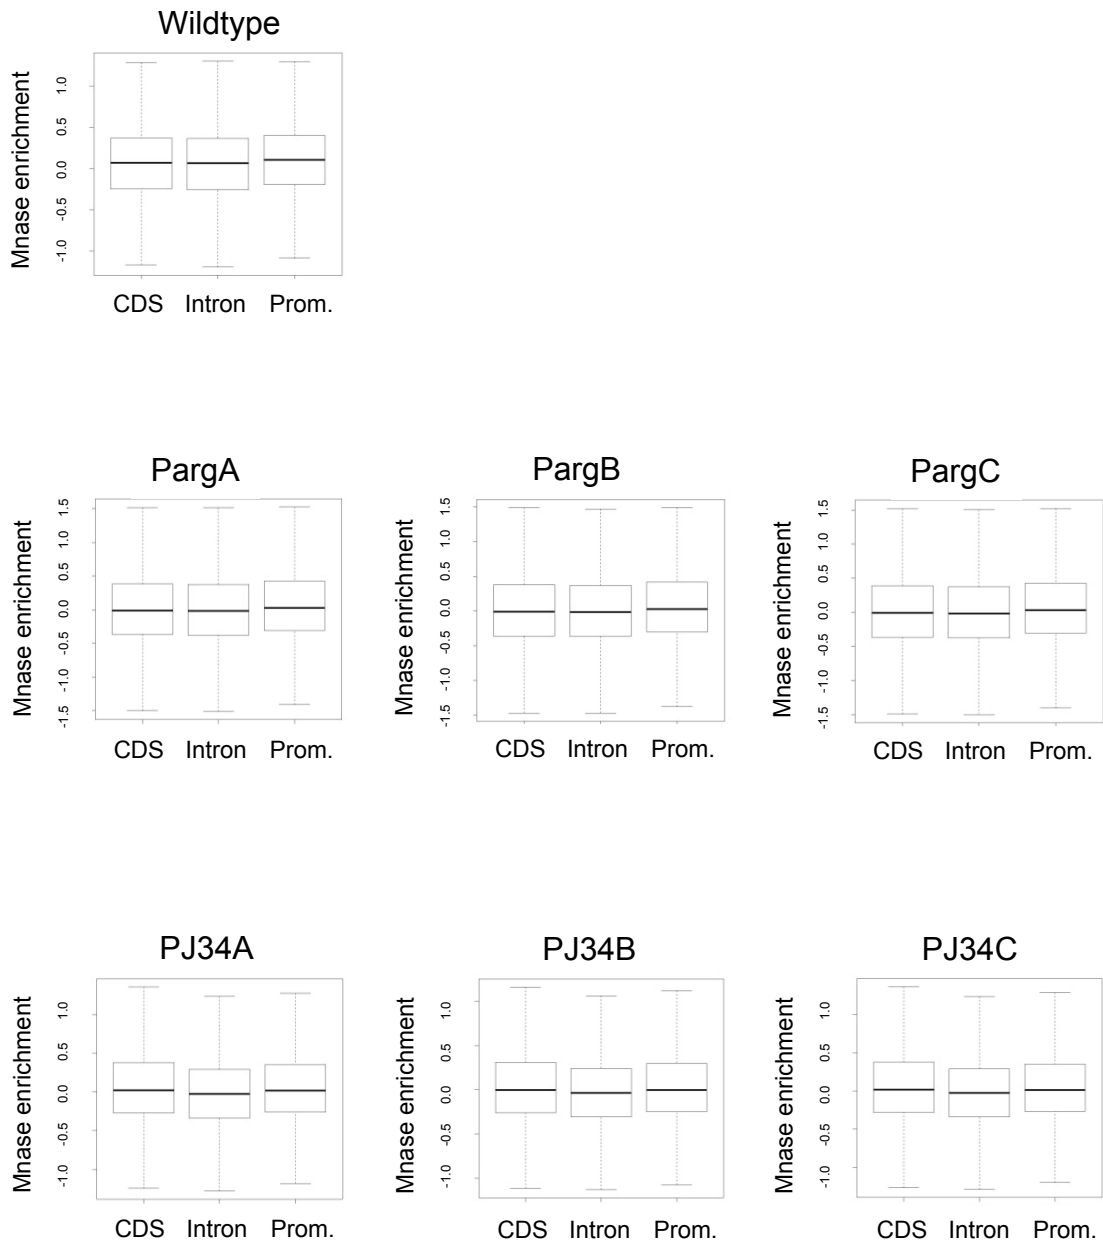

( $P \ll 0.0001$  in all samples)

Figure S2

**B**

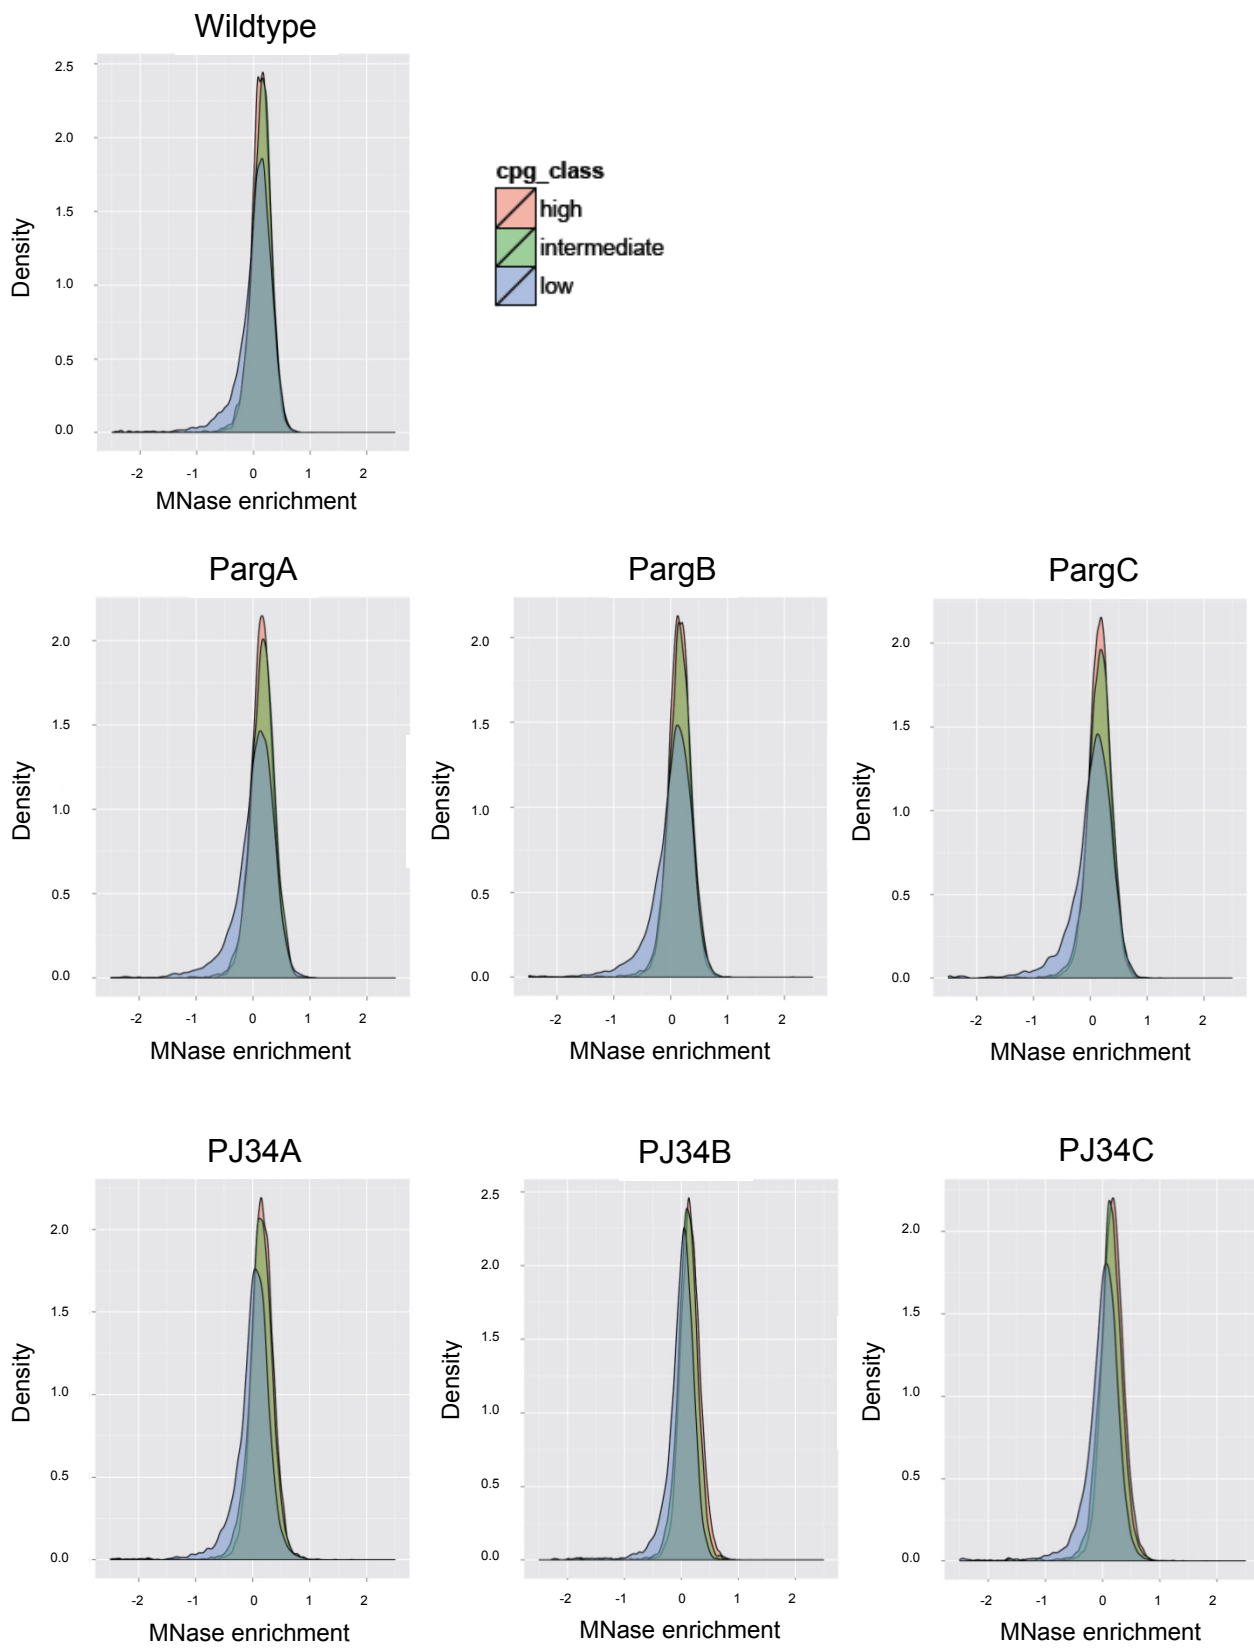

**Figure S2**

( $P << 0.0001$  in all samples)

C

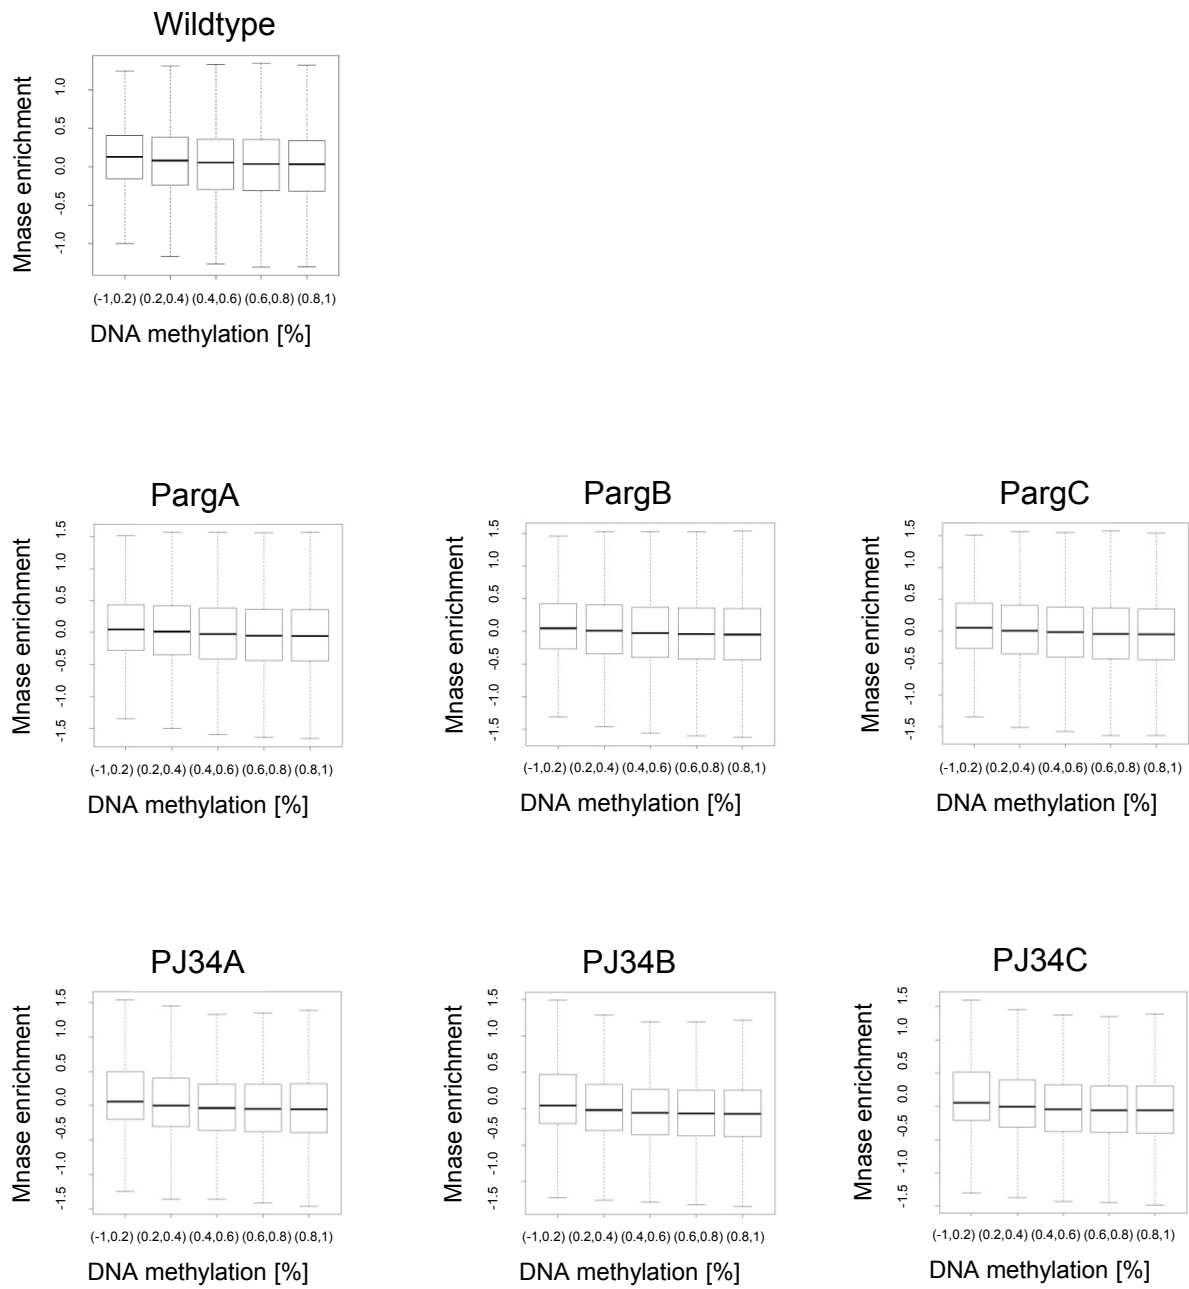

(P <<0.0001 in all samples)

Figure S2
