# Supplementary material for: Paternal Poly (ADP-ribose) Metabolism Modulates Retention of Inheritable Sperm Histones and Early Embryonic Gene Expression
Source: PubMed Central journal article supplement (PMC4014456; doi:10.1371/journal.pgen.1004317), 2014-05-08
Supplement: pgen.1004317.s007.pdf [file pgen.1004317.s007.pdf]

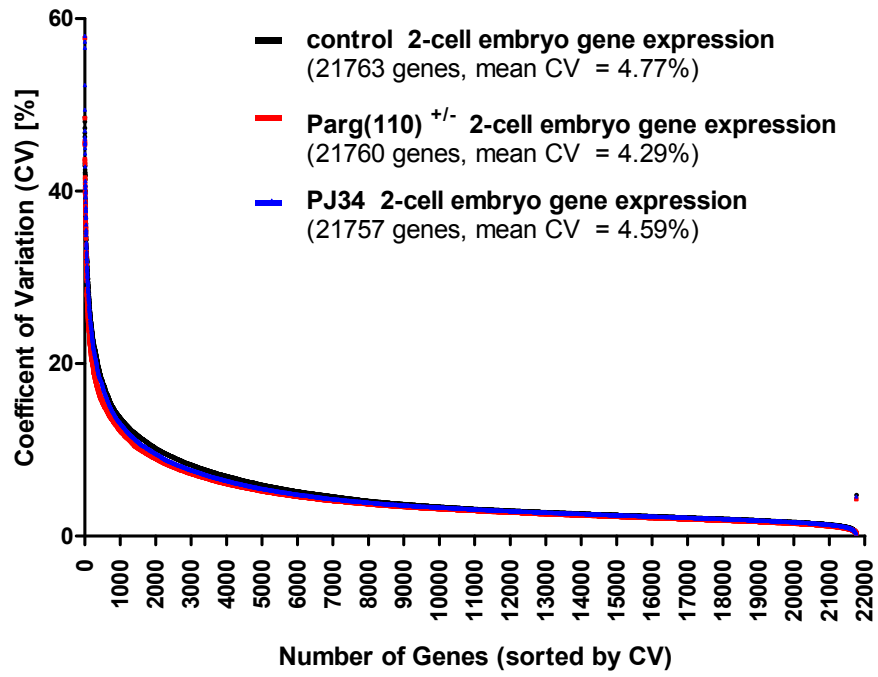

Figure S3
