# Supplementary material for: Paternal Poly (ADP-ribose) Metabolism Modulates Retention of Inheritable Sperm Histones and Early Embryonic Gene Expression
Source: PubMed Central journal article supplement (PMC4014456; doi:10.1371/journal.pgen.1004317), 2014-05-08
Supplement: pgen.1004317.s013.pdf [file pgen.1004317.s013.pdf]

|   |               |                                 |        |        |                                   |        |        |                                 |        |        |
|---|---------------|---------------------------------|--------|--------|-----------------------------------|--------|--------|---------------------------------|--------|--------|
| a | 2CEDE (Yates) | Low er histone retention (MAT-) |        |        | Elevated histone retention (MAT+) |        |        | Low er and elevated HR (MAT-/+) |        |        |
|   |               | PARG A                          | PARG B | PARG C | PARG A                            | PARG B | PARG C | PARG A                          | PARG B | PARG C |
|   | A 1-3         | 0.051                           | 0.275  | 0.105  | 0.420                             | 0.920  | 0.663  | 0.639                           | 0.777  | 0.146  |
|   | B 1-3         | 0.063                           | 0.047  | 0.088  | 0.603                             | 0.024  | 0.888  | 0.229                           | 0.920  | 0.159  |
|   | C 1-3         | 0.169                           | 0.131  | 0.060  | 0.399                             | 1.000  | 0.718  | 0.251                           | 0.327  | 0.083  |
|   | All 2CE       | 0.026                           | 0.005  | 0.009  | 0.212                             | 0.431  | 0.823  | 0.663                           | 0.128  | 0.016  |

  

|   |                 |                                 |        |        |                                   |        |        |                                 |        |        |
|---|-----------------|---------------------------------|--------|--------|-----------------------------------|--------|--------|---------------------------------|--------|--------|
| b | 2CEDE (Pearson) | Low er histone retention (MAT-) |        |        | Elevated histone retention (MAT+) |        |        | Low er and elevated HR (MAT-/+) |        |        |
|   |                 | PARG A                          | PARG B | PARG C | PARG A                            | PARG B | PARG C | PARG A                          | PARG B | PARG C |
|   | A 1-3           | 0.041                           | 0.238  | 0.088  | 0.368                             | 0.823  | 0.597  | 0.584                           | 0.729  | 0.128  |
|   | B 1-3           | 0.055                           | 0.041  | 0.078  | 0.560                             | 0.021  | 0.823  | 0.888                           | 0.210  | 0.146  |
|   | C 1-3           | 0.147                           | 0.113  | 0.050  | 0.357                             | 1.000  | 0.663  | 0.227                           | 0.299  | 0.073  |
|   | All 2CE         | 0.023                           | 0.004  | 0.008  | 0.195                             | 0.406  | 0.791  | 0.639                           | 0.119  | 0.014  |

  

|   |                 |                                 |        |        |                                   |        |        |                                 |        |        |
|---|-----------------|---------------------------------|--------|--------|-----------------------------------|--------|--------|---------------------------------|--------|--------|
| c | HTS 2CE (Yates) | Low er histone retention (MAT-) |        |        | Elevated histone retention (MAT+) |        |        | Low er and elevated HR (MAT-/+) |        |        |
|   |                 | PARG A                          | PARG B | PARG C | PARG A                            | PARG B | PARG C | PARG A                          | PARG B | PARG C |
|   | A 1-3           | 0.017                           | 0.584  | 0.740  | 0.823                             | 0.603  | 0.517  | 0.046                           | 0.219  | 0.357  |
|   | B 1-3           | 0.024                           | 0.026  | 0.222  | 0.012                             | 0.348  | 0.863  | 0.005                           | 0.003  | 0.306  |
|   | C 1-3           | 0.752                           | 0.560  | 0.708  | 0.752                             | 0.185  | 0.590  | 1.000                           | 0.920  | 0.920  |
|   | All 2CE         | 0.017                           | 0.029  | 0.219  | 0.166                             | 0.560  | 0.823  | 0.011                           | 0.004  | 0.190  |

  

|   |                   |                                 |        |        |                                   |        |        |                                 |        |        |
|---|-------------------|---------------------------------|--------|--------|-----------------------------------|--------|--------|---------------------------------|--------|--------|
| d | HTS 2CE (Pearson) | Low er histone retention (MAT-) |        |        | Elevated histone retention (MAT+) |        |        | Low er and elevated HR (MAT-/+) |        |        |
|   |                   | PARG A                          | PARG B | PARG C | PARG A                            | PARG B | PARG C | PARG A                          | PARG B | PARG C |
|   | A 1-3             | 0.012                           | 0.484  | 0.624  | 0.689                             | 0.493  | 0.417  | 0.034                           | 0.176  | 0.297  |
|   | B 1-3             | 0.018                           | 0.020  | 0.182  | 0.008                             | 0.288  | 0.764  | 0.004                           | 0.003  | 0.264  |
|   | C 1-3             | 0.647                           | 0.467  | 0.597  | 0.632                             | 0.137  | 0.488  | 1.000                           | 1.000  | 1.000  |
|   | All 2CE           | 0.013                           | 0.023  | 0.190  | 0.140                             | 0.502  | 0.764  | 0.009                           | 0.003  | 0.168  |

  

|   |               |                                 |       |       |                                   |       |       |                                 |       |       |
|---|---------------|---------------------------------|-------|-------|-----------------------------------|-------|-------|---------------------------------|-------|-------|
| e | 2CEDE (Yates) | Low er histone retention (MAT-) |       |       | Elevated histone retention (MAT+) |       |       | Low er and elevated HR (MAT-/+) |       |       |
|   |               | PJ34A                           | PJ34B | PJ34C | PJ34A                             | PJ34B | PJ34C | PJ34A                           | PJ34B | PJ34C |
|   | A 1-4         | 0.015                           | 0.1   | 0.025 | 0.133                             | 0.729 | 1     | 0.009                           | 0.242 | 0.04  |
|   | B 1-4         | 0.085                           | 0.446 | 0.057 | 0.174                             | 0.036 | 1     | 0.188                           | 0.35  | 0.462 |
|   | C 1-2         | 1                               | 0.286 | 0.617 | 0.764                             | 1     | 0.718 | 0.92                            | 0.454 | 0.92  |
|   | All 2CE       | 0.027                           | 0.092 | 0.007 | 0.086                             | 0.265 | 0.862 | 0.023                           | 0.159 | 0.054 |

  

|   |                 |                                 |       |       |                                   |       |       |                                 |       |       |
|---|-----------------|---------------------------------|-------|-------|-----------------------------------|-------|-------|---------------------------------|-------|-------|
| f | 2CEDE (Pearson) | Low er histone retention (MAT-) |       |       | Elevated histone retention (MAT+) |       |       | Low er and elevated HR (MAT-/+) |       |       |
|   |                 | PJ34A                           | PJ34B | PJ34C | PJ34A                             | PJ34B | PJ34C | PJ34A                           | PJ34B | PJ34C |
|   | A 1-4           | 0.013                           | 0.089 | 0.022 | 0.119                             | 0.689 | 0.92  | 0.008                           | 0.224 | 0.036 |
|   | B 1-4           | 0.074                           | 0.41  | 0.049 | 0.154                             | 0.029 | 1     | 0.17                            | 0.322 | 0.431 |
|   | C 1-2           | 0.92                            | 0.247 | 0.56  | 0.689                             | 0.92  | 0.639 | 0.862                           | 0.406 | 0.841 |
|   | All 2CE         | 0.024                           | 0.083 | 0.009 | 0.079                             | 0.244 | 0.841 | 0.021                           | 0.149 | 0.05  |

Figure S9
